# Supplementary material for: Predictors of New Dementia Diagnoses in Elderly Individuals: A Retrospective Cohort Study Based on Prefecture-Wide Claims Data in Japan
Source: PubMed Central journal article supplement (PMC7828475; doi:10.3390/ijerph18020629), 2021-01-13
Supplement: ijerph-18-00629-s001.pdf [file ijerph-18-00629-s001.pdf]

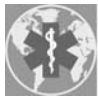

## Supplementary Materials

**Table S1.** Multivariable logistic regression analyses of predictors for new diagnosis of Alzheimer’s disease

| Predictors                                       | Age- and sex- adjusted model  |         | Multivariable-adjusted model <sup>a</sup> |         |
|--------------------------------------------------|-------------------------------|---------|-------------------------------------------|---------|
|                                                  | OR (95%CI)                    | P-value | OR (95%CI)                                | P-value |
| Age (per 1-year increase)                        | 1.05 (1.04-1.05) <sup>c</sup> | <0.001  | 1.04 (1.04-1.05)                          | <0.001  |
| Female                                           | 1.24 (1.20-1.28) <sup>d</sup> | <0.001  | 1.22 (1.18-1.26)                          | <0.001  |
| Cerebrovascular disease                          | 1.16 (1.12-1.20)              | <0.001  | 1.12 (1.08-1.16)                          | <0.001  |
| Diabetes mellitus                                | 0.99 (0.96-1.02)              | 0.486   | 0.99 (0.95-1.02)                          | 0.462   |
| Ischemic heart disease                           | 1.00 (0.96-1.04)              | 0.939   | 0.98 (0.94-1.02)                          | 0.412   |
| Atrial fibrillation                              | 0.93 (0.88-0.98)              | 0.012   | 0.93 (0.87-0.98)                          | 0.010   |
| Depression or use of antidepressants at baseline | 1.45 (1.38-1.52)              | <0.001  | 1.32 (1.25-1.39)                          | <0.001  |
| Use of antipsychotics at baseline                | 1.45 (1.35-1.56)              | <0.001  | 1.21 (1.12-1.31)                          | <0.001  |
| Use of anxiolytics at baseline                   | 1.12 (1.09-1.16)              | <0.001  | 1.00 (0.96-1.04)                          | 0.919   |
| Use of hypnotics at baseline                     | 1.27 (1.21-1.33)              | <0.001  | 1.15 (1.08-1.22)                          | <0.001  |
| Use of antihypertensive drugs at baseline        | 0.95 (0.92-0.98)              | 0.002   | 0.92(0.89-0.95)                           | <0.001  |
| Use of dyslipidemia drugs at baseline            | 0.97 (0.94-1.00)              | 0.084   | 0.96 (0.93-1.00)                          | 0.029   |
| Use of antithrombotics at baseline               | 1.12 (1.08-1.16)              | <0.001  | 1.07 (1.03-1.12)                          | <0.001  |

Abbreviations: OR, odds ratio; CI, confidence interval. <sup>a</sup>Adjusted for age, sex, cardiovascular risk factors, and neurological or psychiatric risk factors. <sup>b</sup>The OR of age was adjusted for sex. <sup>c</sup>The OR of sex was adjusted for age.

**Table S2.** Multivariable logistic regression analyses of predictors for new diagnosis of vascular dementia

| Predictors                                       | Age- and sex- adjusted model  |         | Multivariable-adjusted model <sup>a</sup> |         |
|--------------------------------------------------|-------------------------------|---------|-------------------------------------------|---------|
|                                                  | OR (95%CI)                    | P-value | OR (95%CI)                                | P-value |
| Age (per 1-year increase)                        | 1.07 (1.05-1.08) <sup>c</sup> | <0.001  | 1.06 (1.04-1.08)                          | <0.001  |
| Female                                           | 0.81 (0.69-0.96) <sup>d</sup> | 0.014   | 0.84 (0.71-1.00)                          | 0.050   |
| Cerebrovascular disease                          | 2.41 (2.05-2.82)              | <0.001  | 2.20 (1.83-2.65)                          | <0.001  |
| Diabetes mellitus                                | 1.12 (0.94-1.33)              | 0.213   | 1.06 (0.88-1.27)                          | 0.526   |
| Ischemic heart disease                           | 0.94 (0.76-1.17)              | 0.589   | 0.84 (0.67-1.05)                          | 0.118   |
| Atrial fibrillation                              | 1.09 (0.82-1.45)              | 0.534   | 0.98 (0.73-1.31)                          | 0.894   |
| Depression or use of antidepressants at baseline | 1.86 (1.47-2.36)              | <0.001  | 1.33 (1.02-1.74)                          | 0.036   |
| Use of antipsychotics at baseline                | 2.90 (2.18-3.86)              | <0.001  | 2.25 (1.64-3.07)                          | <0.001  |
| Use of anxiolytics at baseline                   | 1.22 (1.01-1.46)              | 0.036   | 1.00 (0.80-1.25)                          | 0.980   |
| Use of hypnotics at baseline                     | 1.23 (0.94-1.62)              | 0.126   | 0.92 (0.66-1.27)                          | 0.607   |
| Use of antihypertensive drugs at baseline        | 1.17 (0.99-1.40)              | 0.071   | 1.02 (0.85-1.23)                          | 0.813   |
| Use of dyslipidemia drugs at baseline            | 0.82 (0.68-0.99)              | 0.036   | 0.73 (0.60-0.88)                          | 0.001   |
| Use of antithrombotics at baseline               | 1.66 (1.41-1.97)              | <0.001  | 1.19 (0.98-1.44)                          | 0.084   |

Abbreviations: OR, odds ratio; CI, confidence interval. <sup>a</sup>Adjusted for age, sex, cardiovascular risk factors, and neurological or psychiatric risk factors. <sup>b</sup>The OR of age was adjusted for sex. <sup>c</sup>The OR of sex was adjusted for age.
